# Supplementary material for: The Protective Effects of Increasing Serum Uric Acid Level on Development of Metabolic Syndrome
Source: PubMed Central journal article supplement — Diabetes Metab J. 2019 Feb 21;43(4):504–20. doi: 10.4093/dmj.2018.0079 (PMC6712225; doi:10.4093/dmj.2018.0079), 2019-02-21
Supplement: dmj-43-504-s002.pdf [file dmj-43-504-s002.pdf]

**Supplementary Table 2.** Baseline clinical and biochemical characteristic of study subjects based on baseline serum uric acid quartile categories and both sexes according to incident metabolic syndrome: male

| Characteristic                      | Percent changes in serum uric acid (not incident MetS in male, n=5,682) |                                            |                                        |                                   | Percent changes in serum uric acid (incident MetS in male, n=2,012) |                                  |                                          |                                      |                                 |         |
|-------------------------------------|-------------------------------------------------------------------------|--------------------------------------------|----------------------------------------|-----------------------------------|---------------------------------------------------------------------|----------------------------------|------------------------------------------|--------------------------------------|---------------------------------|---------|
|                                     | Quartile 1<br>(≤-9.1%,<br>n=1,382)                                      | Quartile 2<br>(-9.0% to -0.1%,<br>n=1,386) | Quartile 3<br>(0% to 8.2%,<br>n=1,423) | Quartile 4<br>(≥8.3%,<br>n=1,491) | P value                                                             | Quartile 1<br>(≤-9.1%,<br>n=545) | Quartile 2<br>(-9.0% to -0.1%,<br>n=544) | Quartile 3<br>(0% to 8.2%,<br>n=485) | Quartile 4<br>(≥8.3%,<br>n=438) | P value |
| Age, yr                             | 52.8±8.4                                                                | 51.7±8.2                                   | 51.2±8.5                               | 51.0±8.3                          | 0.000                                                               | 52.5±8.0                         | 51.9±7.6                                 | 51.3±7.6                             | 51.5±8.6                        | 0.025   |
| Smoking status                      |                                                                         |                                            |                                        |                                   | 0.000                                                               |                                  |                                          |                                      |                                 | 0.090   |
| Current smoker                      | 316 (22.9)                                                              | 315 (22.7)                                 | 379 (26.6)                             | 430 (28.8)                        |                                                                     | 162 (29.7)                       | 178 (32.7)                               | 138 (28.5)                           | 160 (36.5)                      |         |
| Ex-smoker                           | 695 (50.3)                                                              | 652 (47.0)                                 | 626 (44.0)                             | 642 (43.1)                        |                                                                     | 263 (48.3)                       | 233 (42.8)                               | 237 (48.9)                           | 184 (42.0)                      |         |
| Non-smoker                          | 371 (26.8)                                                              | 419 (30.2)                                 | 418 (29.4)                             | 419 (28.1)                        |                                                                     | 120 (22.0)                       | 133 (24.4)                               | 110 (22.7)                           | 94 (21.5)                       |         |
| BMI, kg/m <sup>2</sup>              | 23.6±2.2                                                                | 23.8±2.1                                   | 23.5±2.3                               | 23.4±2.1                          | 0.012                                                               | 25.1±2.1                         | 25.2±2.0                                 | 25.3±2.1                             | 25.0±2.1                        | 0.822   |
| Waist circumference, cm             | 84.8±5.9                                                                | 85.2±5.8                                   | 84.2±6.2                               | 83.9±6.1                          | 0.000                                                               | 89.3±5.8                         | 89.6±5.6                                 | 89.5±5.9                             | 88.2±5.7                        | 0.010   |
| Fat-free mass, %                    | 80.2±4.5                                                                | 79.7±4.6                                   | 79.9±4.8                               | 79.8±6.4                          | 0.090                                                               | 78.2±4.2                         | 78.2±4.1                                 | 77.7±4.0                             | 77.8±4.0                        | 0.056   |
| Systolic BP, mm Hg                  | 110.9±13.9                                                              | 111.3±13.6                                 | 111.9±13.7                             | 113.3±14.3                        | 0.000                                                               | 115.0±13.6                       | 115.2±12.8                               | 114.4±12.8                           | 115.6±13.4                      | 0.757   |
| Diastolic BP, mm Hg                 | 69.3±9.5                                                                | 69.9±9.5                                   | 70.1±9.6                               | 70.8±9.9                          | 0.000                                                               | 72.5±8.8                         | 71.9±9.0                                 | 71.7±8.9                             | 72.9±8.7                        | 0.656   |
| eGFR, mL/min/1.73 m <sup>2</sup>    | 86.4±11.3                                                               | 87.1±11.1                                  | 88.5±11.6                              | 89.7±11.7                         | 0.000                                                               | 86.8±10.9                        | 86.4±11.2                                | 88.1±12.1                            | 90.0±12.2                       | 0.000   |
| Fasting glucose, mg/dL              | 88.7±12.3                                                               | 88.7±11.5                                  | 89.3±13.8                              | 90.6±16.9                         | 0.000                                                               | 92.5±15.0                        | 92.2±13.0                                | 92.1±13.3                            | 94.2±16.6                       | 0.120   |
| Fasting insulin, μU/mL <sup>a</sup> | 7.6 (5.9-9.7)                                                           | 7.8 (6.1-10.0)                             | 7.6 (5.9-9.5)                          | 7.7 (6.0-9.7)                     | 0.120                                                               | 9.0 (6.9-11.4)                   | 8.5 (6.9-10.9)                           | 9.3 (7.1-11.5)                       | 8.9 (7.1-11.6)                  | 0.110   |
| HOMA-IR <sup>a</sup>                | 1.7 (1.2-2.2)                                                           | 1.7 (1.3-2.3)                              | 1.6 (1.3-2.1)                          | 1.7 (1.3-2.2)                     | 0.073                                                               | 2.1 (1.5-2.6)                    | 1.9 (1.5-2.5)                            | 2.1 (1.6-2.7)                        | 2.1 (1.6-2.7)                   | 0.133   |
| Total cholesterol, mg/dL            | 189.4±30.8                                                              | 189.5±30.1                                 | 188.3±30.0                             | 187.5±29.8                        | 0.052                                                               | 194.0±30.9                       | 190.6±30.4                               | 189.7±31.0                           | 188.8±30.6                      | 0.006   |
| TG, mg/dL                           | 100.0<br>(76.0-133.0)                                                   | 100.0<br>(77.0-134.0)                      | 100.0<br>(76.0-133.0)                  | 105.0<br>(79.0-135.0)             | 0.028                                                               | 129.0<br>(100.0-174.0)           | 135.0<br>(106.0-180.5)                   | 134.0<br>(106.0-170.0)               | 136.0<br>(104.0-186.0)          | 0.321   |
| LDL-C, mg/dL                        | 124.7±28.0                                                              | 124.8±27.5                                 | 123.4±26.8                             | 121.7±26.6                        | 0.001                                                               | 131.2±28.4                       | 128.4±27.0                               | 126.8±27.7                           | 123.4±28.6                      | 0.000   |
| HDL-C, mg/dL                        | 58.0±12.8                                                               | 57.2±12.1                                  | 57.0±12.2                              | 56.6±12.1                         | 0.002                                                               | 52.1±10.2                        | 51.0±10.7                                | 50.3±9.8                             | 51.9±11.2                       | 0.415   |
| hs-CRP, mg/L                        | 0.1±0.3                                                                 | 0.1±0.4                                    | 0.1±0.3                                | 0.1±0.4                           | 0.803                                                               | 0.1±0.2                          | 0.1±0.3                                  | 0.2±0.8                              | 0.2±0.4                         | 0.377   |
| Baseline SUA, mg/dL                 | 6.1±1.2                                                                 | 5.9±1.0                                    | 5.7±1.0                                | 5.3±1.0                           | 0.000                                                               | 6.4±1.3                          | 6.1±1.2                                  | 5.9±1.1                              | 5.5±1.1                         | 0.000   |
| Change in SUA, %                    | -16.5±6.3                                                               | -4.9±2.3                                   | 3.5±2.6                                | 18.3±9.5                          | 0.000                                                               | -15.7±5.8                        | -4.8±2.3                                 | 3.4±2.6                              | 18.1±9.2                        | 0.000   |

Values are presented as mean ± standard deviation, number (%), or median (interquartile range). Characteristics of the study population according to the serum uric acid quartile were compared using one-way analysis of variance (ANOVA) or Kruskal-Wallis test for continuous variables and chi-square test for categorical variables. MetS, metabolic syndrome; BMI, body mass index; BP, blood pressure; eGFR, estimated glomerular filtration rate; HOMA-IR, homeostasis model assessment index for insulin resistance; TG, triglyceride; LDL-C, low density lipoprotein cholesterol; HDL-C, high density lipoprotein cholesterol; hs-CRP, high-sensitivity C-reactive protein; SUA, serum uric acid. <sup>a</sup>n=5,188 male.
