# Supplementary material for: The Protective Effects of Increasing Serum Uric Acid Level on Development of Metabolic Syndrome
Source: PubMed Central journal article supplement — Diabetes Metab J. 2019 Feb 21;43(4):504–20. doi: 10.4093/dmj.2018.0079 (PMC6712225; doi:10.4093/dmj.2018.0079), 2019-02-21
Supplement: dmj-43-504-s004.pdf [file dmj-43-504-s004.pdf]

**Supplementary Table 4.** Hazard ratios and 95% confidence intervals for development of metabolic syndrome according to percent change in serum uric acid level as a continuous variable, regarding to the quartile categories of the basal serum uric acid level: male

|               | Baseline serum uric acid (male, <i>n</i> =7,694) |                |                                                   |                |                                                   |                |                                                |                |
|---------------|--------------------------------------------------|----------------|---------------------------------------------------|----------------|---------------------------------------------------|----------------|------------------------------------------------|----------------|
|               | Quartile 1<br>(≤5.1 mg/dL,<br><i>n</i> =2,146)   | <i>P</i> value | Quartile 2<br>(5.2–5.8 mg/dL,<br><i>n</i> =1,938) | <i>P</i> value | Quartile 3<br>(5.9–6.6 mg/dL,<br><i>n</i> =1,905) | <i>P</i> value | Quartile 4<br>(≥6.7 mg/dL,<br><i>n</i> =1,705) | <i>P</i> value |
| Incident MetS | 491 (22.9)                                       |                | 395 (20.4)                                        |                | 532 (27.9)                                        |                | 594 (34.8)                                     |                |
| Unadjusted    | 0.954 (0.888–1.025)                              | 0.202          | 1.025 (0.936–1.122)                               | 0.598          | 1.023 (0.946–1.106)                               | 0.567          | 0.987 (0.912–1.069)                            | 0.987          |
| Model 1       | 0.932 (0.869–0.999)                              | 0.048          | 0.954 (0.870–1.046)                               | 0.315          | 0.987 (0.912–1.069)                               | 0.749          | 0.965 (0.889–1.046)                            | 0.385          |
| Model 2       | 0.933 (0.869–1.002)                              | 0.057          | 0.926 (0.844–1.016)                               | 0.106          | 0.920 (0.848–0.999)                               | 0.046          | 0.972 (0.895–1.055)                            | 0.494          |
| Model 3       | 0.932 (0.868–1.001)                              | 0.052          | 0.929 (0.847–1.019)                               | 0.119          | 0.921 (0.849–1.000)                               | 0.050          | 0.991 (0.911–1.078)                            | 0.836          |
| Model 4       | 0.921 (0.848–1.001)                              | 0.052          | 0.954 (0.855–1.064)                               | 0.395          | 0.917 (0.834–1.008)                               | 0.072          | 0.997 (0.899–1.105)                            | 0.950          |

Values are presented as number (%) or hazard ratio (95% confidence interval). Model 1: adjusted for age, systolic blood pressure, body mass index, fat-free mass (%), estimated glomerular filtration rate, and smoking status; Model 2: adjusted for Model 1 plus fasting glucose, triglyceride, low density lipoprotein cholesterol, and high density lipoprotein cholesterol; Model 3: adjusted for Model 2 plus baseline serum uric acid; Model 4: adjusted for Model 3 plus fasting insulin.<sup>a</sup>

MetS, metabolic syndrome.

<sup>a</sup>*n*=5,188 male.
