# Supplementary material for: The Protective Effects of Increasing Serum Uric Acid Level on Development of Metabolic Syndrome
Source: PubMed Central journal article supplement — Diabetes Metab J. 2019 Feb 21;43(4):504–20. doi: 10.4093/dmj.2018.0079 (PMC6712225; doi:10.4093/dmj.2018.0079), 2019-02-21
Supplement: dmj-43-504-s006.pdf [file dmj-43-504-s006.pdf]

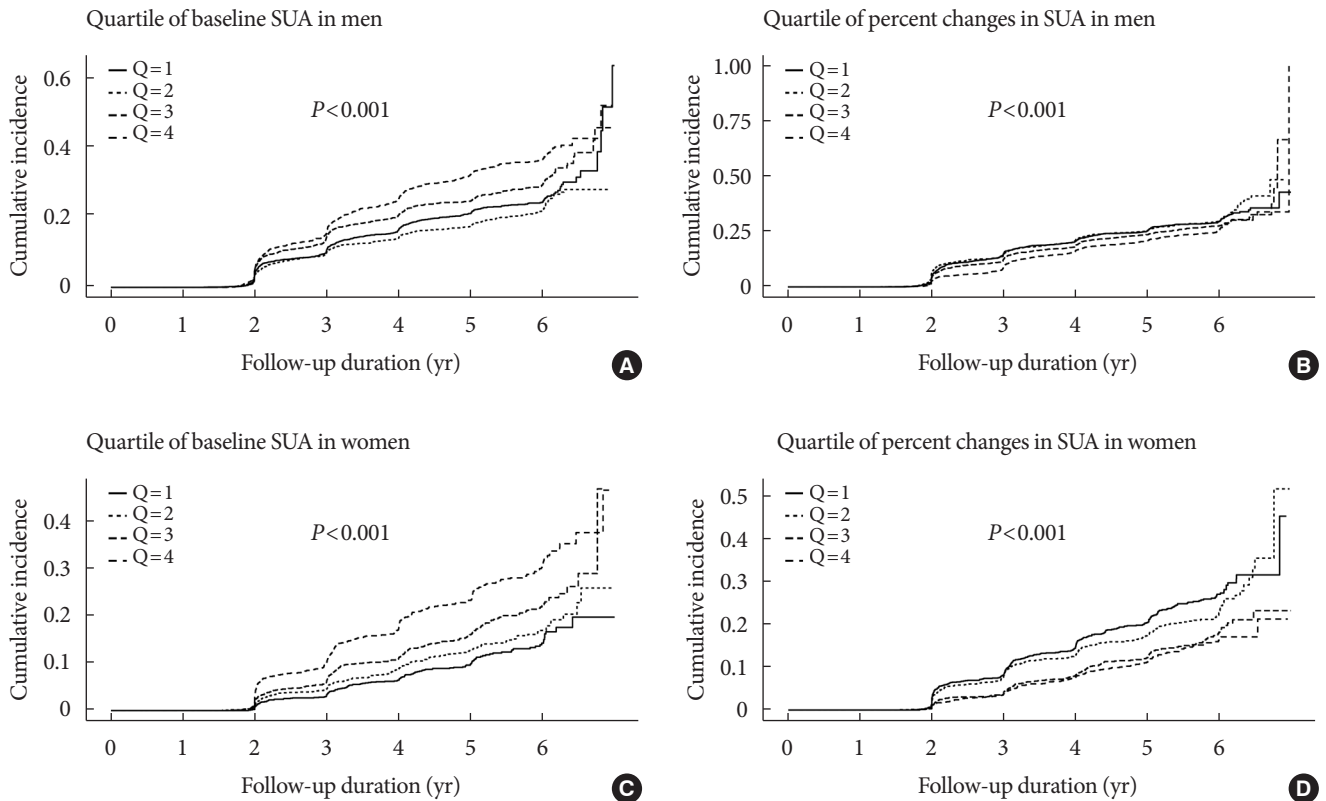

**Supplementary Fig. 1.** Cumulative incidence of metabolic syndrome (MetS) using the Kaplan-Meier method and the log-rank test according to serum uric acid (SUA) quartile categories and percent change in SUA quartile categories according to both sexes. Fourth quartile (Q4) of the percent change in SUA shows a higher cumulative incidence of MetS than the other quartiles in both sexes ( $P < 0.001$ ). (A) Cumulative incidence of MetS according to baseline SUA quartile categories in male. (B) Cumulative incidence of MetS according to percent change in SUA quartile categories in male. (C) Cumulative incidence of MetS according to baseline SUA quartile categories in female. (D) Cumulative incidence of MetS according to percent change in SUA quartile categories in female.
